# Supplementary material for: Phenothiazine-based benzoxazole derivates exhibiting mechanochromic luminescence: the effect of a bromine atom
Source: Royal Society of Chemistry journal article supplement (doi:10.1039/c4tc00061g), 2014-01-01
Supplement: c4tc00061g1.pdf [file c4tc00061g1.pdf]

## Supporting information for

### **Phenothiazine-Based Benzoxazole Derivates Exhibiting Mechanochromic Luminescence: Effect of Bromine Atom**

*Pengchong Xue,<sup>\*a,b</sup> Boqi Yao,<sup>a</sup> Jiabao Sun,<sup>a</sup> Qiuxia Xu,<sup>a</sup> Peng Chen,<sup>c</sup> Zhenqi Zhang,<sup>a</sup>*

*and Ran Lu<sup>\*a</sup>*

<sup>a</sup> State Key Laboratory of Supramolecular Structure and Materials, College of Chemistry, Jilin University, Changchun, P. R. China

<sup>b</sup> State Key Laboratory of Theoretical and Computational Chemistry, Jilin University, Changchun, P. R. China

<sup>c</sup> Key Laboratory of Functional Inorganic Material Chemistry (MOE), School of Chemistry and Materials Science, Heilongjiang University, Harbin, P. R. China.

**Table S1** Electronic transition data obtained by the TD/DFT-B3LYP/6-31G calculation for **PVB** and **BPVB**.

|             | Electronic transition | $\lambda_{\text{abs}}$ (nm) | E (eV) | Oscillator strength | Transition assignment |
|-------------|-----------------------|-----------------------------|--------|---------------------|-----------------------|
| <b>PVB</b>  | 1                     | 433.82                      | 2.8580 | 0.4620              | HOMO→LUMO             |
| <b>BPVB</b> | 1                     | 424.43                      | 2.9212 | 0.6417              | HOMO→LUMO             |

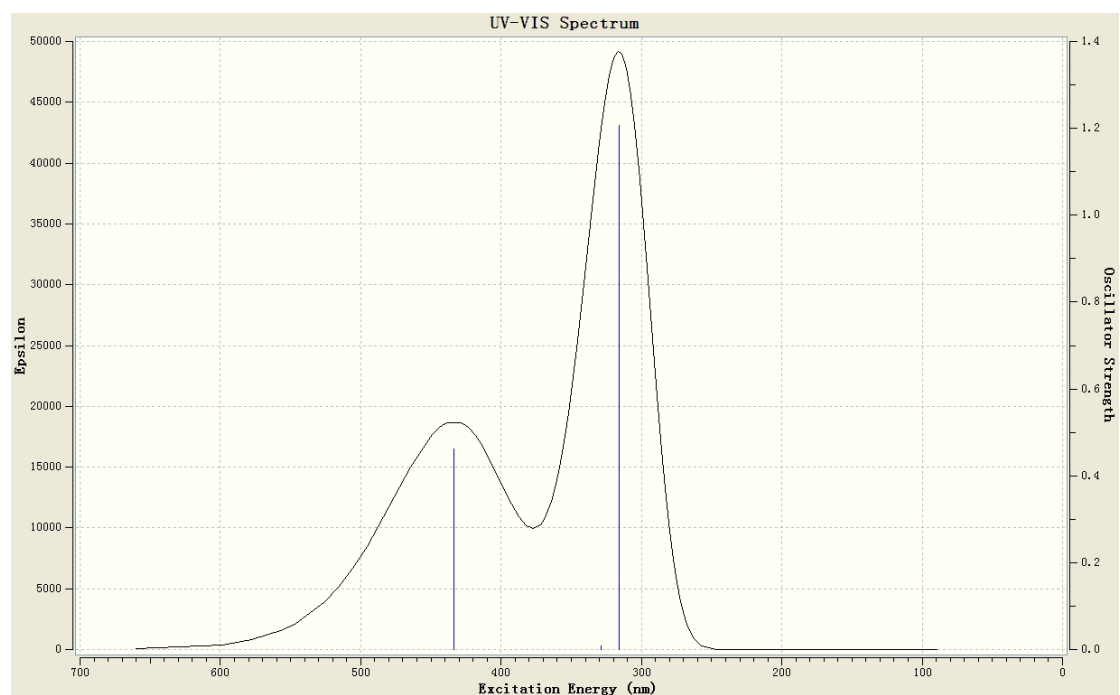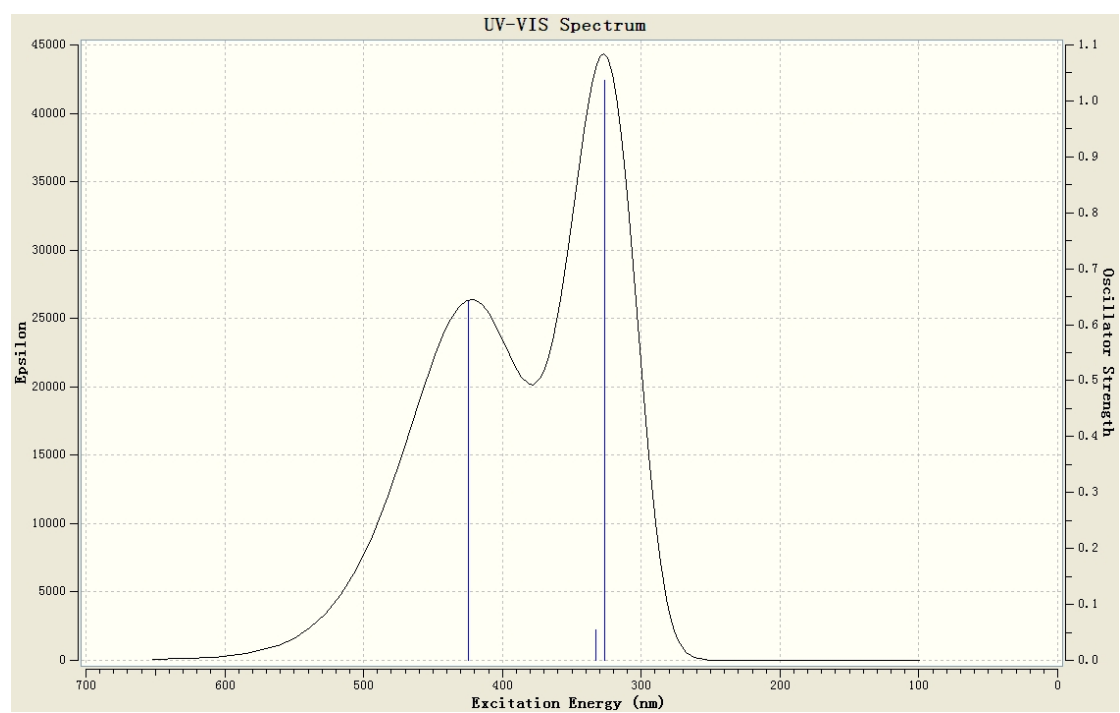

**Fig. S1** Simulated UV-Vis absorption spectrum of **PVB** (top) and **BPVB** (bottom).

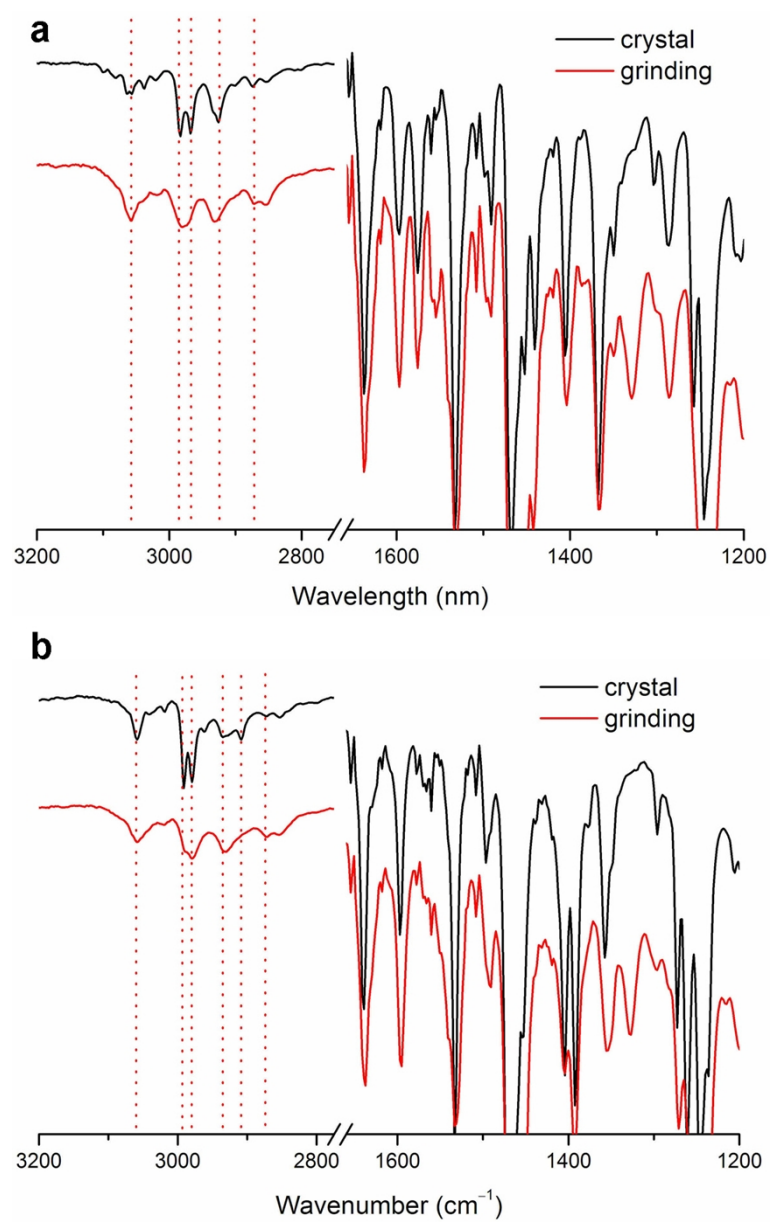

**Fig. S2** IR spectra of **PVB** (a) and **BPVB** (b) before and after grinding.

**Table S2.** Crystal data of **PVB** and **BPVB**.

|                      | <b>PVB</b>                                        | <b>BPVB</b>                                         |
|----------------------|---------------------------------------------------|-----------------------------------------------------|
| Formula sum          | C <sub>23</sub> H <sub>18</sub> N <sub>2</sub> OS | C <sub>23</sub> H <sub>16</sub> BrN <sub>2</sub> OS |
| Formula weight       | 370.45                                            | 448.35                                              |
| Crystal system       | monoclinic                                        | triclinic                                           |
| Space group          | <i>P</i> 21/c                                     | <i>P</i> -1                                         |
| Unit cell dimensions | <i>a</i> = 13.690(3) Å                            | <i>a</i> = 4.1159(8) Å                              |
|                      | <i>b</i> = 21.558(4) Å                            | <i>b</i> = 11.407(2) Å                              |
|                      | <i>c</i> = 6.2444(12) Å                           | <i>c</i> = 20.162(4) Å                              |
|                      | ∠ = 95.33(3) °                                    | ∠ = 93.04(3) °                                      |
|                      |                                                   | ∠ = 91.76(3) °                                      |
|                      |                                                   | ∠ = 99.00(3) °                                      |
| Cell volume          | 1834.94(60) Å <sup>3</sup>                        | 932.91(30) Å <sup>3</sup>                           |
| <i>Z</i>             | 4                                                 | 2                                                   |
| Density, calculated  | 1.341 g/cm <sup>3</sup>                           | 1.596 g/cm <sup>3</sup>                             |
| R <sub>All</sub>     | 0.076                                             | 0.076                                               |
| Pearson code         | mP180                                             | aP88                                                |
| Formula type         | NOP2Q18R23                                        | NOPQ2R23...                                         |
| Wyckoff sequence     | e <sup>45</sup>                                   | i <sup>44</sup>                                     |

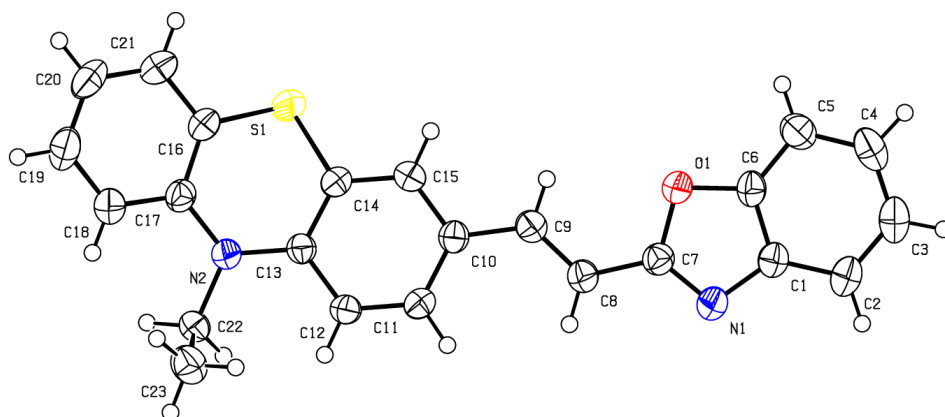

**Fig. S3** Crystal structure of **PVB** (50% probability for thermal ellipsoids).

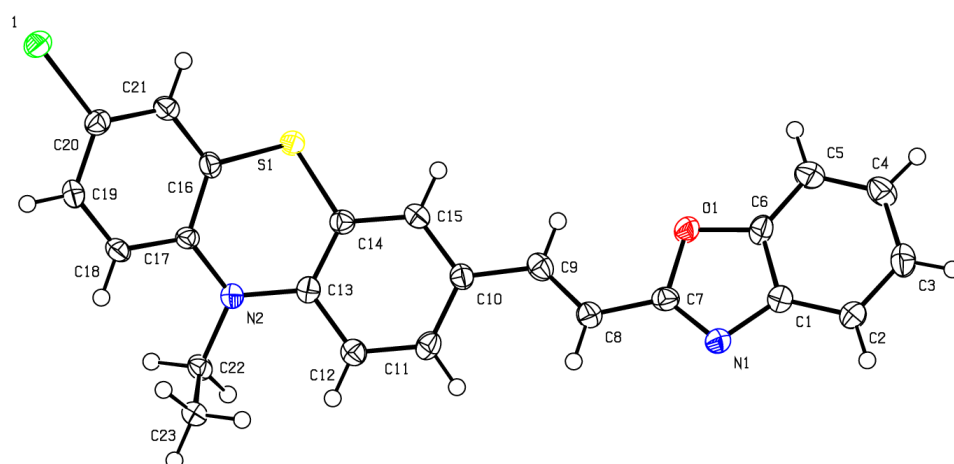

**Fig. S4** Crystal structure of **BPVB** (50% probability for thermal ellipsoids).
